# Supplementary material for: Calcium-dependent protein kinases in cotton: insights into early plant responses to salt stress
Source: BMC Plant Biol. 2018 Jan 17;18:15. doi: 10.1186/s12870-018-1230-8 (PMC5772696; doi:10.1186/s12870-018-1230-8)
Supplement: Supplementary file 1 — Summary of cotton CPKs. (XLSX 15 kb) [file 12870_2018_1230_MOESM1_ESM.xlsx]

## Sheet: Sheet1
		Additional file 1 Summary information of cotton CPKs
		Gene_ID	Accession number	Length of CDS (bp)	No. of AA	pI	Mw (kD)
		GhCPK1	A01G0621	1614	537	6.06	60.5359
		GhCPK2	A01G1119	1773	590	5.38	66.2376
		GhCPK3	A02G0144	1599	532	5.59	60.6887
		GhCPK4	A02G0609	1536	511	5.48	57.1432
		GhCPK5	A02G1029	1560	519	5.62	58.5997
		GhCPK6	A02G1635	1626	541	8.94	61.334
		GhCPK7	A02G1796	1668	555	6.47	63.1151
		GhCPK8	A03G1505	1707	568	5.72	63.602
		GhCPK9	A04G0148	1575	524	5.98	58.8239
		GhCPK10	A04G0467	1719	572	5.35	63.5541
		GhCPK11	A04G0780	1584	527	6.04	59.3939
		GhCPK12	A04G1372	1947	648	5.36	71.7473
		GhCPK13	A04G1429	1644	547	5.79	61.3208
		GhCPK14	A05G0617	1599	532	5.38	59.5192
		GhCPK15	A05G1571	2724	907	6.62	100.918
		GhCPK16	A05G2355	1509	502	5.51	56.4666
		GhCPK17	A05G2859	1605	534	6.64	60.699
		GhCPK18	A05G3246	1494	497	5.31	55.9457
		GhCPK19	A06G0013	1581	526	5.98	59.2414
		GhCPK20	A06G1503	795	264	5.28	29.7487
		GhCPK21	A06G1772	1584	527	5.27	59.3154
		GhCPK22	A07G1099	1542	513	5.27	57.2607
		GhCPK23	A07G1123	1584	527	6.59	59.5025
		GhCPK24	A07G1236	1878	625	9.28	69.5186
		GhCPK25	A08G0912	1725	574	9.06	64.0145
		GhCPK26	A08G2530	1617	538	5.37	60.5077
		GhCPK27	A09G1033	1572	523	5.69	58.5515
		GhCPK28	A09G1067	1596	531	6.17	59.8565
		GhCPK29	A09G1081	1731	576	8.83	64.435
		GhCPK30	A09G1157	1596	531	6.32	60.2137
		GhCPK31	A09G1248	1833	610	5.1	68.2423
		GhCPK32	A10G0124	1659	552	6.05	62.2061
		GhCPK33	A10G0886	1635	544	8.49	61.9217
		GhCPK34	A10G1195	1614	537	5.71	61.2981
		GhCPK35	A10G1756	1803	600	5.2	66.968
		GhCPK36	A11G0213	1593	530	6.41	60.3948
		GhCPK37	A11G0907	1800	599	8.95	66.4327
		GhCPK38	A11G1615	1665	554	9.08	62.7006
		GhCPK39	A11G1762	1881	626	8.72	69.8015
		GhCPK40	A11G2941	1590	529	6.36	59.5281
		GhCPK41	A11G3011	1653	550	6.15	62.3264
		GhCPK42	A12G0109	1683	560	5.6	62.564
		GhCPK43	A12G0646	1854	617	8.83	68.7553
		GhCPK44	A12G2686	1605	534	5.91	60.2403
		GhCPK45	A13G0017	1740	579	5.77	64.6446
		GhCPK46	A13G0563	1527	508	6.26	56.8514
		GhCPK47	A13G0566	1464	487	5.06	54.6245
		GhCPK48	A13G1164	1611	536	5.94	60.3668
		GhCPK49	A13G1891	1584	527	5.84	58.7608
		GhCPK50	D01G1194	1776	591	5.34	66.3367
		GhCPK51	D01G2360	1614	537	6.14	60.4598
		GhCPK52	D02G0183	1344	447	5.26	51.0276
		GhCPK53	D02G0663	1527	508	5.48	56.8419
		GhCPK54	D02G1973	1707	568	5.72	63.572
		GhCPK55	D03G0087	1626	541	9	61.286
		GhCPK56	D03G0609	1653	550	6.6	62.2902
		GhCPK57	D03G0701	3576	1191	8.94	134.301
		GhCPK58	D04G0366	996	331	4.92	37.0221
		GhCPK59	D04G0895	1947	648	5.32	71.8284
		GhCPK60	D04G0900	1719	572	5.3	63.6001
		GhCPK61	D04G1271	1584	527	6.04	59.443
		GhCPK62	D04G1486	1659	552	5.26	61.9439
		GhCPK63	D05G0748	1599	532	5.38	59.5062
		GhCPK64	D05G1749	2724	907	6.46	101.033
		GhCPK65	D05G2622	1509	502	5.46	56.4005
		GhCPK66	D05G3156	1605	534	6.8	60.7171
		GhCPK67	D05G3567	1575	524	6.06	58.7007
		GhCPK68	D06G1869	1563	520	5.59	57.76
		GhCPK69	D06G2206	1584	527	5.37	59.3184
		GhCPK70	D07G1198	1542	513	5.27	57.3117
		GhCPK71	D07G1228	1674	557	7.24	62.4699
		GhCPK72	D07G1343	1824	607	8.87	67.5581
		GhCPK73	D08G0142	1617	538	5.28	60.5117
		GhCPK74	D08G1115	1725	574	8.88	63.8954
		GhCPK75	D08G2300	3060	1019	6.3	117.36
		GhCPK76	D09G1054	1575	524	5.44	58.5663
		GhCPK77	D09G1074	1596	531	6.13	59.8475
		GhCPK78	D09G1090	1731	576	8.97	64.3879
		GhCPK79	D09G1163	1596	531	6.32	60.2278
		GhCPK80	D09G1249	1833	610	5.2	68.2143
		GhCPK81	D10G0130	1656	551	5.94	62.0147
		GhCPK82	D10G0863	1635	544	8.63	61.9508
		GhCPK83	D10G1303	1488	495	5.44	56.3182
		GhCPK84	D10G2029	1755	584	5.31	64.9848
		GhCPK85	D11G0227	1593	530	6.14	60.3557
		GhCPK86	D11G0314	1653	550	6.15	62.3124
		GhCPK87	D11G1053	1800	599	8.95	66.4507
		GhCPK88	D11G1774	1665	554	9.08	62.7887
		GhCPK89	D11G1919	1881	626	8.84	69.7353
		GhCPK90	D11G3329	1584	527	6.04	59.2849
		GhCPK91	D12G0121	1728	575	5.74	64.5744
		GhCPK92	D12G0848	1833	610	8.66	67.8803
		GhCPK93	D12G2743	1605	534	5.98	60.2433
		GhCPK94	D13G0033	1722	573	5.87	64.085
		GhCPK95	D13G0560	1572	523	6	58.401
		GhCPK96	D13G0561	1464	487	5.06	54.6315
		GhCPK97	D13G1455	1611	536	5.98	60.4157
		GhCPK98	D13G2278	1386	461	6.01	51.4763
